# Supplementary material for: Association of Non-Alcoholic Fatty Liver Disease and Hepatic Fibrosis with Epicardial Adipose Tissue Volume and Atrial Deformation Mechanics in a Large Asian Population Free from Clinical Heart Failure
Source: MDPI journal article supplement (doi:10.3390/diagnostics12040916), 2022-04-06
Supplement: s1 [file s1]

**Supplementary Table S1: Baseline demographics, adiposity measures and biomarkers after excluding the youngest quartile from non-fatty liver group**

|                                  | Non-fatty liver | NAFLD, low<br>fibrosis score<br>( $<-1.455$ ) | NAFLD, high<br>fibrosis score<br>( $\geq-1.455$ ) | P <sub>trend</sub> |
|----------------------------------|-----------------|-----------------------------------------------|---------------------------------------------------|--------------------|
|                                  | N=764           | N=840                                         | N=302                                             |                    |
| Age, years                       | 50.64(9.1)      | 47.69(9.1)*                                   | 56.37(8.34)*†                                     | <0.001             |
| Female sex, %                    | 390 (51.0%)     | 211 (25.1%)*                                  | 76 (25.2%)*                                       | <0.001             |
| SBP, mmHg                        | 118.48(15.28)   | 123.86(16.42)*                                | 129.21(16.03)*†                                   | <0.001             |
| DBP, mmHg                        | 73.99(9.93)     | 78.04(10.21)*                                 | 80.45(10.06)*†                                    | <0.001             |
| <b><i>Adiposity measures</i></b> |                 |                                               |                                                   |                    |
| EFV, ml                          | 63.65(25.67)    | 79.73(26.25)*                                 | 95.13(31.67)*†                                    | <0.001             |
| BMI, kg/m <sup>2</sup>           | 22.33(2.49)     | 25.69(3.17)*                                  | 27.21(3.53)*†                                     | <0.001             |
| WC, cm                           | 77.95(7.75)     | 87.29(8.24)*                                  | 91.06(9.46)*†                                     | <0.001             |
| Body fat, %                      | 23.96(6.45)     | 27.42(7.38)*                                  | 28.9(7.61)*†                                      | <0.001             |
| <b><i>Biomarkers</i></b>         |                 |                                               |                                                   |                    |
| Fasting glucose, mg/dl           | 94.01(10.15)    | 100.15(18.17)*                                | 118.17(32.1)*†                                    | <0.001             |
| HbA1c, %                         | 5.59(0.42)      | 5.74(0.66)*                                   | 6.32(1.18)*†                                      | <0.001             |

|                      |               |                |                 |        |
|----------------------|---------------|----------------|-----------------|--------|
| Fasting insulin, U/L | 6.53(3.71)    | 10.01(6.16)*   | 10.86(5.81)*    | <0.001 |
| HOMA-IR              | 1.51(0.92)    | 2.5(1.78)*     | 3.23(2.05)*†    | <0.001 |
| Hs-CRP, mg/L         | 1.56(4.63)    | 2.42(4.16)*    | 2.67(3.73)*     | 0.001  |
| GOT, IU/L            | 21.56(6.38)   | 26.11(11.3)*   | 28.1(14.57)*†   | <0.001 |
| GPT, IU/L            | 21.59(10.65)  | 36.42(24.24)*  | 34.44(21.94)*   | <0.001 |
| TC, mg/dL            | 204.76(35.84) | 211.29(36.5)*  | 207.02(35.7)    | <0.001 |
| TG, mg/dL            | 106.81(58.96) | 167.19(95.16)* | 170.79(111.15)* | <0.001 |
| LDL-C, mg/dL         | 130.61(33.9)  | 140.58(33.38)* | 136.89(31.84)*  | <0.001 |
| HDL-C, mg/dL         | 61.28(16.04)  | 48.77(12.45)*  | 47.96(11.41)*   | <0.001 |
| eGFR, ml/min/m2      | 89.69(15.93)  | 89.3(15.2)     | 85.39(16.84)*†  | <0.001 |

Data presented as mean(SD)

P-value<0.05 for comparisons against \* Non-fatty liver, † Fatty liver with low fibrosis score

Abbreviations: SBP=systolic blood pressure, DBP=diastolic blood pressure, EFV=epicardial fat volume, BMI=body mass index, WC=waist circumference, HOMA-IR=homeostasis model assessment-insulin resistance, Hs-CRP=high-sensitivity C-reactive protein, GOT=glutamic oxaloacetic transaminase, GPT=glutamate pyruvate transaminase, TC=total cholesterol, TG=triglyceride, LDL-C=low-density lipoprotein cholesterol, HDL-C=high-density lipoprotein cholesterol, eGFR=estimated glomerular filtration rate

**Supplementary Table S2: Echocardiographic parameters after excluding the youngest quartile from non-fatty liver group**

|                                  | Non-fatty liver | NAFLD, low<br>fibrosis score<br>( $<-1.455$ ) | NAFLD, high<br>fibrosis score<br>( $\geq-1.455$ ) | P <sub>trend</sub> |
|----------------------------------|-----------------|-----------------------------------------------|---------------------------------------------------|--------------------|
|                                  | N=1019          | N=840                                         | N=302                                             |                    |
| LVST, mm                         | 8.69(1.02)      | 9.14(0.96)*                                   | 9.54(1.02)*†                                      | <0.001             |
| LVPT, mm                         | 8.69(0.92)      | 9.13(0.88)*                                   | 9.48(0.95)*†                                      | <0.001             |
| RWT                              | 0.38(0.04)      | 0.39(0.04)*                                   | 0.4(0.04)*†                                       | <0.001             |
| LVEDV, ml                        | 72.51(13.36)    | 77.26(12.48)*                                 | 80.75(11.04)*†                                    | <0.001             |
| LVEF, %                          | 62.92(5.02)     | 62.16(5.2)*                                   | 62.34(5.08)                                       | 0.01               |
| LVM, gm                          | 131.35(30.11)   | 146.4(27.82)*                                 | 159.65(30.33)*†                                   | <0.001             |
| LVMi(BSA),<br>gm/m <sup>2</sup>  | 73.84(13.99)    | 74.89(12.56)                                  | 80.42(13.79)*†                                    | <0.001             |
| LVMi, gm/m <sup>2.7</sup>        | 34.66(7.22)     | 36.86(7.11)*                                  | 41.08(7.94)*†                                     | <0.001             |
| LAV, ml                          | 26.94(9.0)      | 31.44(11.22)*                                 | 35.63(12.48)*†                                    | <0.001             |
| LAEF, %                          | 58.61(10.46)    | 57.72(10.73)                                  | 56.94(10.48)                                      | 0.05               |
| <b><i>Diastolic function</i></b> |                 |                                               |                                                   |                    |
| DT, ms                           | 199.28(39.02)   | 201.19(35.32)                                 | 214.5(40.65)*†                                    | 0.001              |

|                              |              |              |                |        |
|------------------------------|--------------|--------------|----------------|--------|
| IVRT, ms                     | 88.98(14.14) | 89.87(13.64) | 94.03(18.93)*† | <0.001 |
| E/A                          | 1.29(0.43)   | 1.19(0.37)*  | 1.04(0.36)*†   | <0.001 |
| LV e', cm/sec                | 9.62(2.09)   | 9.11(2.04)*  | 7.85(1.88)*†   | <0.001 |
| LV s', cm/sec                | 8.3(1.45)    | 8.32(2.07)   | 7.98(1.45)*†   | 0.01   |
| E/e'                         | 7.03(2.28)   | 7.11(2.43)   | 8.08(3.05)*†   | <0.001 |
| <b><i>Strain indices</i></b> |              |              |                |        |
| LV GLS, %                    | 20.75(1.93)  | 19.78(1.6)*  | 19.53(1.71)*   | <0.001 |
| PALS, %                      | 39.38(7.44)  | 36.96(7.77)* | 34.05(8.01)*†  | <0.001 |
| ALSR <sub>syst</sub>         | 1.76(0.39)   | 1.66(0.36)*  | 1.52(0.35)*†   | <0.001 |
| ALSR <sub>early</sub>        | 1.88(0.5)    | 1.66(0.49)*  | 1.35(0.45)*†   | <0.001 |
| ALSR <sub>late</sub>         | 2.04(0.49)   | 2.07(0.5)    | 2.05(0.49)     | 0.55   |
| LA <sub>stiff</sub>          | 0.18(0.08)   | 0.2(0.09)*   | 0.26(0.15)*†   | <0.001 |

Data presented as mean(SD)

P-value<0.05 for comparisons against \* Non-fatty liver, † Fatty liver with low fibrosis score

Abbreviations: LVST=left ventricular septal wall thickness, LVPT=left ventricular posterior wall thickness, RWT=relative wall thickness, LVEDV=left ventricular end-diastolic volume, LVM=left ventricular mass, LVMi=left ventricular mass index, LAV=left atrial volume, LAEF=left atrial emptying fraction, DT=deceleration time, IVRT=isovolumetric relaxation time, E/A=early-to-late diastolic mitral inflow velocity ratio, e'=early-diastolic tissue Doppler velocity, s'=systolic tissue Doppler velocity, GLS= global longitudinal strain, PALS=peak atrial longitudinal strain, ALSR<sub>syst</sub>=atrial longitudinal strain rate-systolic phase, ALSR<sub>early</sub>=atrial longitudinal strain rate-early diastolic phase, ALSR<sub>late</sub>=atrial longitudinal strain rate-late diastolic phase, LA<sub>stiff</sub>=LA stiffness
